# Supplementary material for: Pediatric central venous access devices: practice, performance, and costs
Source: PubMed Central journal article supplement (PMC9700519; doi:10.1038/s41390-022-01977-1), 2022-02-08
Supplement: 41390_2022_1977_MOESM1_ESM.pdf [file 41390_2022_1977_MOESM1_ESM.pdf]

## Supplementary Material 1: Definitions of CVAD complications

| <b>Variable</b>                                          | <b>Definition</b>                                                                                                                                                                                                                                                                                                                                                                                          |
|----------------------------------------------------------|------------------------------------------------------------------------------------------------------------------------------------------------------------------------------------------------------------------------------------------------------------------------------------------------------------------------------------------------------------------------------------------------------------|
| <b>Catheter-associated bloodstream infection (CABSI)</b> | A laboratory confirmed bloodstream infection (BSI) where an eligible BSI organism is identified with a CVAD in place for >2 consecutive calendar days on the day of the BSI (day of CVAD placement being Day 1) and the CVAD was in place on the date of the event or the day before, (see CDC Device-associated Module BSI for full criteria) <sup>3</sup> confirmed by an infectious disease specialist. |
| <b>Local infection</b>                                   | Clinical signs of local venous infection at the CVAD insertion site (e.g., purulent drainage), confirmed with a positive (>15cfu) swab or catheter tip, but with negative or no blood culture (see CDC VASC definition for full criteria for full criteria) <sup>3</sup> confirmed by an infectious disease specialist.                                                                                    |
| <b>Venous thrombosis</b>                                 | Ultrasound/venographic/image confirmed thrombosed vessel at CVAD location, in a symptomatic patient (pain, swelling). <sup>17, 18</sup>                                                                                                                                                                                                                                                                    |
| <b>Breakage</b>                                          | Visible split in CVAD material, evidence of external fluid leakage or radiographic evidence of extravasation/infiltration into tissue <sup>19</sup>                                                                                                                                                                                                                                                        |
| <b>Occlusion</b>                                         | Unable to inject or aspirate from the CVAD <sup>20</sup>                                                                                                                                                                                                                                                                                                                                                   |
| <b>Dislodgement and migration</b>                        | <i>Partial:</i> Change in CVAD length at insertion site (inner catheter visible), displacement of the CVAD tip so it is no longer central, however remains in the vein, or displacement of the TIVD needle from the reservoir.<br><i>Total:</i> CVAD completely leaves the vein or TIVD reservoir displacement. <sup>18</sup>                                                                              |
| <b>Severe skin complication</b>                          | Allergic dermatitis, extravasation or surgical wound dehiscence                                                                                                                                                                                                                                                                                                                                            |

BSI: Bloodstream infection; CDC: Centers for Disease Control and Prevention; CFU: Colony forming units; CVAD: Central venous access device; TIVD: Totally implanted venous device; VASC: Vascular access site complication

## Supplementary Material 2: Directed Acyclic Graphs for variable selection.

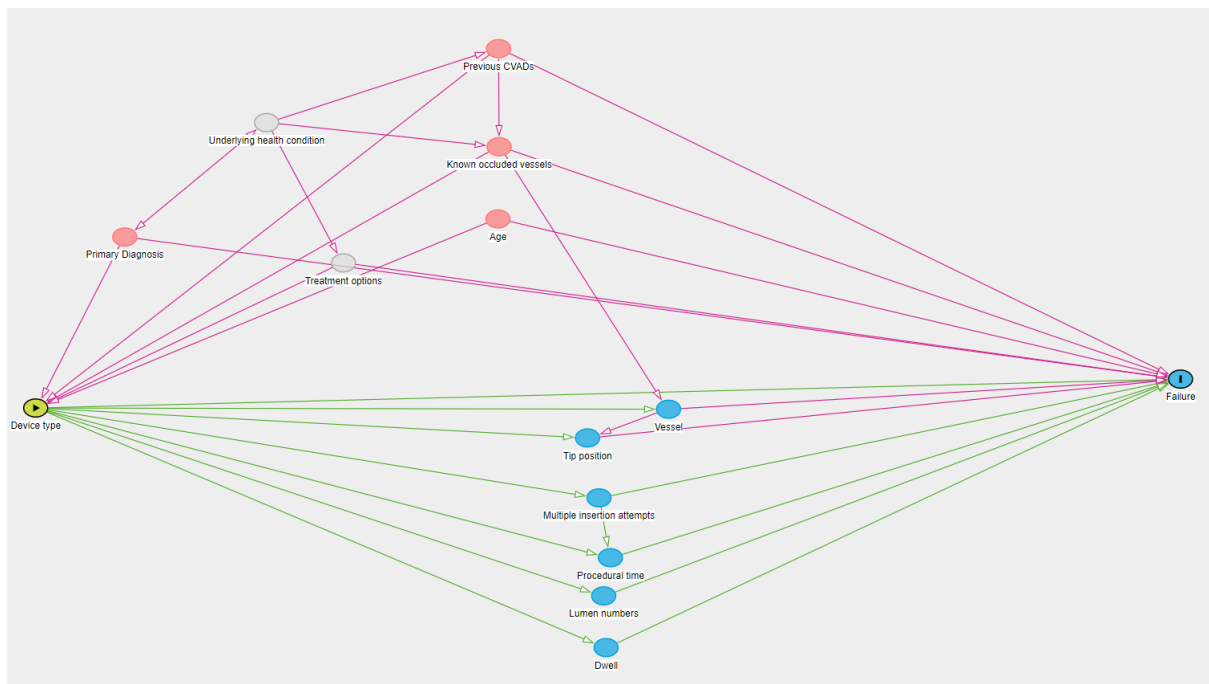

CVAD: Central venous access device

**Supplementary Material 4: Unit costs used in the study (2020 A\$)**

| <b>Resource item</b>                    | <b>Unit</b>           | <b>Unit cost</b>                 |
|-----------------------------------------|-----------------------|----------------------------------|
| <b>Staff</b>                            |                       |                                  |
| Registered nurse                        | Per minute            | \$0.85                           |
| Registered Medical Officer              | Per minute            | \$1.21                           |
| <b>Service</b>                          |                       |                                  |
| Ultrasound                              | Per item <sup>a</sup> | \$117.20                         |
| X-ray                                   | Per item              | \$40.10                          |
| Blood culture                           | Per item <sup>b</sup> | \$4.55                           |
| <b>Equipment</b>                        |                       |                                  |
| PICC                                    | Per item              | \$140                            |
| Tunnelled catheter                      | Per item              | \$315                            |
| Tunneled HD (Hickman Catheter®)         | Per item              | \$185                            |
| Non-tunneled catheter                   | Per item              | \$60                             |
| Totally implanted                       | Per item              | \$450                            |
| Gloves – non sterile                    | Per item              | \$1.22                           |
| Gloves – sterile                        | Per item              | \$0.05                           |
| Saline ampule                           | Per item              | \$0.05                           |
| 10ml syringe                            | Per item              | \$0.09                           |
| 1ml syringe                             | Per item              | \$0.24                           |
| 3-way tap (no extension)                | Per item              | \$0.62                           |
| Alcohol/ CHG swab (small square)        | Per item              | \$0.12                           |
| Alcohol/ CHG swab (small stick)         | Per item              | \$0.24                           |
| Prefilled syringe                       | Per item              | \$0.42                           |
| Needleless connector                    | Per item              | \$1.35                           |
| Clamp                                   | Per item              | \$2.87                           |
| Dressing pack                           | Per item              | \$0.46                           |
| Drawing up needle                       | Per item              | \$0.02                           |
| Bottle CHG – 30ml                       | Per item              | \$1.93                           |
| Sterile gauze                           | Per item              | \$0.12                           |
| Sodium Chloride 1L                      | Per item              | \$0.99                           |
| Burette                                 | Per item              | \$5.54                           |
| Administration set                      | Per item              | \$8.26                           |
| Sterile scissors                        | Per item              | \$2.65                           |
| Needle                                  | Per item              | \$0.13                           |
| <b>Medications</b>                      |                       |                                  |
| Enoxaparin sodium                       | Per dose              | \$135.44                         |
| Lignocaine and prilocaine mixture cream | Per 5g tube           | \$6.70                           |
| Vancomycin                              | Per 500 mg vial       | \$8.22                           |
| Alteplase                               | Per 2mg vial          | \$99.00                          |
| Ceftriaxone                             | Per 1g vial           | \$3.10                           |
| Gentamicin                              | Per dose              | \$11.17 for 80 mg/2 mL injection |

<sup>a</sup>MBS item 13815, <sup>b</sup>MBS item 73802.

Available at <http://www.mbsonline.gov.au/internet/mbsonline/publishing.nsf/Content/Home>

CHG: Chlorhexidine gluconate, MBS: Medicare Benefits Schedule

**Supplementary Material 4: Univariable and multivariable analyses of the association between CVAD device types and time to first CVAD failure (Device N= 200; Participant N=163)**

|                                                                      | <b>No fail</b> | <b>Fail</b> | <b>Univariable<br/>Hazard ratios (95% CI)</b> | <b>Multivariable<br/>Hazard ratios (95% CI)</b> |
|----------------------------------------------------------------------|----------------|-------------|-----------------------------------------------|-------------------------------------------------|
| <b>Device type</b> (Ref: PICC)                                       | 100 (84.0)     | 19 (16.0)   | 1.0                                           | 1.0                                             |
| Totally implanted                                                    | 17 (81.0)      | 4 (19.0)    | 0.40 (0.13-1.23)                              | 0.33 (0.10-1.13)                                |
| Non-tunneled                                                         | 11 (61.1)      | 7 (38.9)    | 6.82 (2.70-17.20)*                            | 4.27 (1.49-12.18)*                              |
| Tunneled                                                             | 25 (78.1)      | 7 (21.9)    | 0.53 (0.22-1.31)                              | 0.40 (0.15-1.03)                                |
| Hemodialysis                                                         | 7 (70.0)       | 3 (30.0)    | 1.50 (0.43-5.19)                              | 1.23 (0.31-4.84)                                |
| <b>Age</b> (1-year increase):<br>Median (IQR)                        | 5 (8.3)        | 3 (4.2)     | 0.92 (0.86-0.99)*                             | 0.93 (0.86-1.02)                                |
| <b>Previous device</b> (No)                                          | 80 (84.2)      | 15 (15.8)   | 1.0                                           | 1.0                                             |
| Yes                                                                  | 80 (76.2)      | 25 (23.8)   | 1.08 (0.56-2.10)                              | 1.35 (0.61-2.99)                                |
| <b>Previous vessel occlusion</b> (No)                                | 129 (80.6)     | 31 (19.4)   | 1.0                                           | 1.0                                             |
| Yes                                                                  | 31 (77.5)      | 9 (22.5)    | 0.96 (0.44-2.10)                              | 0.89 (0.38-2.12)                                |
| <b>Primary Diagnosis</b> (Ref: Neuro, Renal, Orthopedics, and Other) | 43 (82.7)      | 9 (17.3)    | 1.0                                           | 1.0                                             |
| Cardiac                                                              | 9 (81.8)       | 2 (18.2)    | 0.96 (0.21-4.45)                              | 0.68 (0.14-3.30)                                |
| GI/ Liver                                                            | 15 (57.7)      | 11 (42.3)   | 1.90 (0.78-4.60)                              | 1.28 (0.47-3.48)                                |
| Other respiratory                                                    | 21 (91.3)      | 2 (8.7)     | 0.65 (0.14-3.05)                              | 0.81 (0.16-4.01)                                |
| Cystic fibrosis                                                      | 31 (93.9)      | 2 (6.1)     | 0.38 (0.08-1.79)                              | 0.62 (0.12-3.30)                                |
| Oncology/Hematology                                                  | 41 (74.6)      | 14 (25.5)   | 0.64 (0.27-1.50)                              | 1.09 (0.42-2.83)                                |

\*Statistically significant at p <0.05

Cox proportional hazards model with shared frailty term set at participant's level was used to account for intra-subject correlation.

CI: Confidence interval; IQR: Interquartile range; PICC: Peripherally inserted central catheter; Ref: Referent
